# Supplementary material for: Parity and Mortality: An Examination of Different Explanatory Mechanisms Using Data on Biological and Adoptive Parents
Source: PubMed Central journal article supplement (PMC6357259; doi:10.1007/s10680-018-9469-1), 2018-02-21

## Appendices

**Table S1. Results: All-cause Mortality for Swedish Women, Born 1915 to 1960.**

| Variable           | Category                | RR        | SE   | 95% CI    | RR   | SE   | 95% CI    |
|--------------------|-------------------------|-----------|------|-----------|------|------|-----------|
| Parity             | Childless               | 1.00      |      |           | 1.00 |      |           |
|                    | Biological - 1          | 0.86      | 0.00 | 0.85-0.86 | 1.01 | 0.00 | 1.00-1.02 |
|                    | Biological - 2          | 0.74      | 0.00 | 0.73-0.74 | 0.90 | 0.00 | 0.89-0.90 |
|                    | Biological - 3          | 0.75      | 0.00 | 0.74-0.76 | 0.91 | 0.00 | 0.90-0.92 |
|                    | Biological - 4          | 0.82      | 0.00 | 0.81-0.82 | 0.97 | 0.01 | 0.96-0.98 |
|                    | Biological - 5          | 0.89      | 0.01 | 0.87-0.90 | 1.01 | 0.01 | 0.99-1.02 |
|                    | Biological - 6          | 0.95      | 0.01 | 0.93-0.97 | 1.06 | 0.01 | 1.03-1.08 |
|                    | Biological - 7          | 1.02      | 0.02 | 0.98-1.05 | 1.10 | 0.02 | 1.06-1.14 |
|                    | Biological - 8          | 1.03      | 0.03 | 0.98-1.09 | 1.04 | 0.03 | 0.99-1.10 |
|                    | Adoptive - 1            | 0.81      | 0.01 | 0.79-0.83 | 0.70 | 0.02 | 0.66-0.75 |
|                    | Adoptive - 2            | 0.58      | 0.01 | 0.56-0.61 | 0.57 | 0.02 | 0.53-0.62 |
|                    | Adoptive - 3            | 0.57      | 0.05 | 0.47-0.69 | 0.61 | 0.06 | 0.50-0.74 |
|                    | Adoptive - 4            | 0.69      | 0.17 | 0.43-1.11 | 0.77 | 0.19 | 0.48-1.24 |
|                    | Birth Cohort            | 1915-1920 | 1.00 |           |      | 1.00 |           |
| 1921-1925          |                         | 0.91      | 0.00 | 0.91-0.92 | 1.06 | 0.01 | 1.05-1.08 |
| 1926-1930          |                         | 0.82      | 0.00 | 0.82-0.83 | 1.12 | 0.01 | 1.11-1.14 |
| 1931-1935          |                         | 0.78      | 0.00 | 0.77-0.79 | 1.14 | 0.01 | 1.12-1.16 |
| 1936-1940          |                         | 0.77      | 0.00 | 0.76-0.78 | 1.21 | 0.01 | 1.19-1.23 |
| 1941-1945          |                         | 0.81      | 0.01 | 0.80-0.82 | 1.38 | 0.01 | 1.35-1.40 |
| 1946-1950          |                         | 0.80      | 0.01 | 0.78-0.81 | 1.45 | 0.01 | 1.42-1.47 |
| 1951-1955          |                         | 0.79      | 0.01 | 0.77-0.81 | 1.53 | 0.02 | 1.49-1.57 |
| 1955-1960          |                         | 0.77      | 0.01 | 0.74-0.79 | 1.52 | 0.03 | 1.47-1.57 |
| Origin of Adoptees | Domestic                |           |      |           | 1.46 | 0.05 | 1.36-1.56 |
|                    | Transnational           |           |      |           | 1.00 |      |           |
|                    | Mixed                   |           |      |           | 1.16 | 0.16 | 0.89-1.52 |
| Education          | Primary <9 years        |           |      |           | 1.00 |      |           |
|                    | Primary - 9 years       |           |      |           | 0.91 | 0.00 | 0.91-0.92 |
|                    | Secondary - 10-11 years |           |      |           | 0.85 | 0.00 | 0.84-0.85 |
|                    | Secondary - 12 years    |           |      |           | 0.80 | 0.01 | 0.78-0.81 |
|                    | Tertiary - 13-15 years  |           |      |           | 0.71 | 0.01 | 0.70-0.72 |
|                    | Tertiary - 15+ years    |           |      |           | 0.65 | 0.00 | 0.64-0.66 |
|                    | Post-graduate           |           |      |           | 0.61 | 0.03 | 0.56-0.67 |
|                    | Missing                 |           |      |           | 7.51 | 0.03 | 7.45-7.57 |
| EGP                | I                       |           |      |           | 1.00 |      | 0.00-0.00 |
|                    | II                      |           |      |           | 0.99 | 0.01 | 0.97-1.01 |
|                    | III                     |           |      |           | 1.08 | 0.01 | 1.06-1.10 |
|                    | IV                      |           |      |           | 0.99 | 0.01 | 0.96-1.01 |
|                    | VI-VII                  |           |      |           | 1.14 | 0.01 | 1.12-1.17 |
|                    | Unknown                 |           |      |           | 1.09 | 0.01 | 1.07-1.12 |

**Table S2. Results: All-cause Mortality for Swedish Men, Born 1915 to 1960.**

| Variable           | Category                | RR        | SE   | 95% CI    | RR   | SE   | 95% CI    |
|--------------------|-------------------------|-----------|------|-----------|------|------|-----------|
| Parity             | Childless               | 1.00      |      |           | 1.00 |      |           |
|                    | Biological - 1          | 0.79      | 0.00 | 0.79-0.80 | 1.01 | 0.00 | 1.00-1.02 |
|                    | Biological - 2          | 0.68      | 0.00 | 0.67-0.68 | 0.90 | 0.00 | 0.90-0.91 |
|                    | Biological - 3          | 0.69      | 0.00 | 0.69-0.70 | 0.92 | 0.00 | 0.92-0.93 |
|                    | Biological - 4          | 0.76      | 0.00 | 0.75-0.77 | 0.98 | 0.00 | 0.97-0.99 |
|                    | Biological - 5          | 0.83      | 0.01 | 0.82-0.85 | 1.04 | 0.01 | 1.02-1.05 |
|                    | Biological - 6          | 0.88      | 0.01 | 0.86-0.90 | 1.07 | 0.01 | 1.04-1.09 |
|                    | Biological - 7          | 0.92      | 0.02 | 0.89-0.95 | 1.08 | 0.02 | 1.04-1.12 |
|                    | Biological - 8          | 0.90      | 0.02 | 0.86-0.95 | 1.01 | 0.03 | 0.96-1.07 |
|                    | Adoptive - 1            | 0.67      | 0.01 | 0.66-0.69 | 0.66 | 0.02 | 0.63-0.70 |
|                    | Adoptive - 2            | 0.51      | 0.01 | 0.49-0.53 | 0.57 | 0.02 | 0.54-0.60 |
|                    | Adoptive - 3            | 0.46      | 0.04 | 0.39-0.54 | 0.51 | 0.04 | 0.43-0.60 |
|                    | Adoptive - 4            | 0.65      | 0.11 | 0.47-0.91 | 0.72 | 0.12 | 0.51-1.01 |
|                    | Birth Cohort            | 1915-1920 | 1.00 |           |      | 1.00 |           |
| 1921-1925          |                         | 0.90      | 0.00 | 0.89-0.90 | 0.98 | 0.01 | 0.97-0.99 |
| 1926-1930          |                         | 0.80      | 0.00 | 0.80-0.81 | 1.07 | 0.01 | 1.06-1.09 |
| 1931-1935          |                         | 0.72      | 0.00 | 0.71-0.72 | 1.08 | 0.01 | 1.07-1.09 |
| 1936-1940          |                         | 0.63      | 0.00 | 0.62-0.64 | 1.06 | 0.01 | 1.05-1.07 |
| 1941-1945          |                         | 0.58      | 0.00 | 0.57-0.58 | 1.12 | 0.01 | 1.10-1.14 |
| 1946-1950          |                         | 0.53      | 0.00 | 0.52-0.53 | 1.10 | 0.01 | 1.09-1.12 |
| 1951-1955          |                         | 0.49      | 0.00 | 0.48-0.50 | 1.13 | 0.01 | 1.11-1.15 |
| 1955-1960          |                         | 0.45      | 0.01 | 0.44-0.46 | 1.06 | 0.02 | 1.03-1.09 |
| Origin of Adoptees | Domestic                |           |      |           | 1.41 | 0.04 | 1.33-1.49 |
|                    | Transnational           |           |      |           | 1.00 |      |           |
|                    | Mixed                   |           |      |           | 1.08 | 0.11 | 0.88-1.33 |
| Education          | Primary < 9 years       |           |      |           | 1.00 |      |           |
|                    | Primary - 9 years       |           |      |           | 1.04 | 0.01 | 1.03-1.05 |
|                    | Secondary - 10-11 years |           |      |           | 0.93 | 0.00 | 0.92-0.93 |
|                    | Secondary - 12 years    |           |      |           | 0.83 | 0.00 | 0.82-0.84 |
|                    | Tertiary - 13-15 years  |           |      |           | 0.77 | 0.00 | 0.76-0.78 |
|                    | Tertiary - 15+ years    |           |      |           | 0.71 | 0.00 | 0.70-0.72 |
|                    | Post-graduate           |           |      |           | 0.63 | 0.01 | 0.61-0.66 |
|                    | Missing                 |           |      |           | 8.06 | 0.03 | 8.01-8.12 |
| EGP                | I                       |           |      |           | 1.00 |      |           |
|                    | II                      |           |      |           | 1.05 | 0.01 | 1.04-1.07 |
|                    | III                     |           |      |           | 1.12 | 0.01 | 1.10-1.14 |
|                    | IV                      |           |      |           | 0.95 | 0.01 | 0.93-0.98 |
|                    | VI-VII                  |           |      |           | 1.19 | 0.01 | 1.17-1.20 |
|                    | Unknown                 |           |      |           | 0.99 | 0.01 | 0.98-1.01 |

**Table S3. Results: Cause-specific Mortality for Swedish Women, Born 1915 to 1960. Model 1 adjusts for birth cohort. Model 2 adjusts for birth cohort, educational attainment, adult socioeconomic status, and origin of adopted children.**

| Cause-of-death                     | Parity         | Model 1 |      |           | Model 2 |      |           |
|------------------------------------|----------------|---------|------|-----------|---------|------|-----------|
|                                    |                | RR      | SE   | 95% CI    | RR      | SE   | 95% CI    |
| Neoplasms                          | Childless      | 1.00    |      |           | 1.00    |      |           |
|                                    | Biological - 1 | 0.93    | 0.01 | 0.91-0.94 | 1.16    | 0.01 | 1.14-1.18 |
|                                    | Biological - 2 | 0.82    | 0.01 | 0.81-0.83 | 1.07    | 0.01 | 1.05-1.08 |
|                                    | Biological - 3 | 0.82    | 0.01 | 0.81-0.83 | 1.07    | 0.01 | 1.05-1.09 |
|                                    | Biological - 4 | 0.85    | 0.01 | 0.83-0.86 | 1.09    | 0.01 | 1.07-1.11 |
|                                    | Biological - 5 | 0.89    | 0.01 | 0.87-0.92 | 1.10    | 0.02 | 1.07-1.13 |
|                                    | Biological - 6 | 0.93    | 0.02 | 0.89-0.98 | 1.13    | 0.03 | 1.08-1.18 |
|                                    | Biological - 7 | 0.88    | 0.03 | 0.82-0.94 | 1.01    | 0.04 | 0.94-1.09 |
|                                    | Biological - 8 | 0.86    | 0.05 | 0.77-0.96 | 0.91    | 0.05 | 0.82-1.01 |
|                                    | Adoptive - 1   | 0.87    | 0.02 | 0.83-0.91 | 0.81    | 0.04 | 0.74-0.90 |
|                                    | Adoptive - 2   | 0.66    | 0.03 | 0.61-0.72 | 0.71    | 0.04 | 0.64-0.79 |
|                                    | Adoptive - 3   | 0.55    | 0.09 | 0.40-0.76 | 0.63    | 0.11 | 0.46-0.88 |
|                                    | Adoptive - 4   | 0.62    | 0.25 | 0.28-1.38 | 0.73    | 0.30 | 0.33-1.65 |
| Diseases of the circulatory system | Childless      | 1.00    |      |           | 1.00    |      |           |
|                                    | Biological - 1 | 0.86    | 0.01 | 0.85-0.87 | 0.97    | 0.01 | 0.96-0.98 |
|                                    | Biological - 2 | 0.75    | 0.00 | 0.74-0.75 | 0.87    | 0.01 | 0.86-0.88 |
|                                    | Biological - 3 | 0.78    | 0.01 | 0.77-0.79 | 0.90    | 0.01 | 0.89-0.91 |
|                                    | Biological - 4 | 0.87    | 0.01 | 0.85-0.88 | 0.98    | 0.01 | 0.96-1.00 |
|                                    | Biological - 5 | 0.97    | 0.01 | 0.95-0.99 | 1.04    | 0.01 | 1.02-1.07 |
|                                    | Biological - 6 | 1.08    | 0.02 | 1.04-1.12 | 1.14    | 0.02 | 1.10-1.18 |
|                                    | Biological - 7 | 1.20    | 0.03 | 1.14-1.26 | 1.23    | 0.03 | 1.17-1.29 |
|                                    | Biological - 8 | 1.23    | 0.05 | 1.14-1.32 | 1.19    | 0.04 | 1.11-1.28 |
|                                    | Adoptive - 1   | 0.83    | 0.02 | 0.80-0.87 | 0.67    | 0.04 | 0.59-0.76 |
|                                    | Adoptive - 2   | 0.58    | 0.02 | 0.53-0.62 | 0.52    | 0.04 | 0.45-0.60 |
|                                    | Adoptive - 3   | 0.50    | 0.09 | 0.35-0.71 | 0.49    | 0.09 | 0.34-0.72 |
|                                    | Adoptive - 4   | 0.29    | 0.20 | 0.07-1.14 | 0.31    | 0.22 | 0.08-1.24 |
| External causes                    | Childless      | 1.00    |      |           | 1.00    |      |           |
|                                    | Biological - 1 | 0.80    | 0.02 | 0.76-0.83 | 1.05    | 0.02 | 1.01-1.09 |
|                                    | Biological - 2 | 0.59    | 0.01 | 0.57-0.61 | 0.81    | 0.02 | 0.78-0.84 |
|                                    | Biological - 3 | 0.59    | 0.01 | 0.57-0.62 | 0.81    | 0.02 | 0.78-0.85 |
|                                    | Biological - 4 | 0.63    | 0.02 | 0.59-0.66 | 0.84    | 0.03 | 0.79-0.89 |
|                                    | Biological - 5 | 0.63    | 0.03 | 0.58-0.69 | 0.81    | 0.04 | 0.74-0.88 |
|                                    | Biological - 6 | 0.60    | 0.04 | 0.52-0.70 | 0.76    | 0.06 | 0.65-0.87 |
|                                    | Biological - 7 | 0.63    | 0.07 | 0.51-0.78 | 0.75    | 0.08 | 0.60-0.93 |
|                                    | Biological - 8 | 0.49    | 0.09 | 0.34-0.72 | 0.54    | 0.10 | 0.37-0.78 |
|                                    | Adoptive - 1   | 0.65    | 0.04 | 0.57-0.75 | 0.54    | 0.09 | 0.39-0.74 |
|                                    | Adoptive - 2   | 0.45    | 0.06 | 0.35-0.57 | 0.45    | 0.08 | 0.32-0.62 |
|                                    | Adoptive - 3   | 0.79    | 0.28 | 0.39-1.57 | 0.84    | 0.32 | 0.40-1.75 |
|                                    | Adoptive - 4   | 0.00    | 0.00 | .         | 0.00    | 0.00 | .         |
| All other causes                   | Childless      | 1.00    |      |           | 1.00    |      |           |
|                                    | Biological - 1 | 0.79    | 0.01 | 0.78-0.80 | 0.90    | 0.01 | 0.89-0.92 |
|                                    | Biological - 2 | 0.66    | 0.00 | 0.65-0.67 | 0.77    | 0.01 | 0.76-0.78 |
|                                    | Biological - 3 | 0.67    | 0.01 | 0.65-0.68 | 0.78    | 0.01 | 0.76-0.79 |
|                                    | Biological - 4 | 0.74    | 0.01 | 0.72-0.75 | 0.84    | 0.01 | 0.82-0.86 |
|                                    | Biological - 5 | 0.80    | 0.01 | 0.78-0.83 | 0.88    | 0.01 | 0.85-0.91 |
|                                    | Biological - 6 | 0.83    | 0.02 | 0.79-0.87 | 0.89    | 0.02 | 0.85-0.94 |
|                                    | Biological - 7 | 0.96    | 0.03 | 0.89-1.02 | 1.01    | 0.03 | 0.94-1.08 |
|                                    | Biological - 8 | 0.98    | 0.05 | 0.89-1.09 | 0.99    | 0.05 | 0.89-1.09 |
|                                    | Adoptive - 1   | 0.74    | 0.02 | 0.71-0.78 | 0.61    | 0.04 | 0.53-0.70 |
|                                    | Adoptive - 2   | 0.52    | 0.03 | 0.47-0.57 | 0.48    | 0.04 | 0.41-0.56 |
|                                    | Adoptive - 3   | 0.63    | 0.11 | 0.44-0.89 | 0.63    | 0.12 | 0.43-0.91 |
|                                    | Adoptive - 4   | 1.45    | 0.48 | 0.75-2.78 | 1.47    | 0.50 | 0.75-2.88 |

**Table S4. Results: Cause-specific Mortality for Swedish Men, Born 1915 to 1960. Model 1 adjusts for birth cohort. Model 2 adjusts for birth cohort, educational attainment, adult socioeconomic status, and origin of adopted children.**

| Cause-of-death                     | Parity         | Model 1 |      | Cause-of-death | Model 2 |                |
|------------------------------------|----------------|---------|------|----------------|---------|----------------|
|                                    |                | RR      | SE   |                | RR      | SE             |
| Neoplasms                          | Childless      | 1.00    |      |                | 1.00    |                |
|                                    | Biological - 1 | 0.98    | 0.01 | 0.97-0.99      | 1.21    | 0.01 1.19-1.22 |
|                                    | Biological - 2 | 0.89    | 0.01 | 0.88-0.90      | 1.14    | 0.01 1.12-1.15 |
|                                    | Biological - 3 | 0.90    | 0.01 | 0.88-0.91      | 1.14    | 0.01 1.13-1.16 |
|                                    | Biological - 4 | 0.94    | 0.01 | 0.93-0.96      | 1.17    | 0.01 1.15-1.19 |
|                                    | Biological - 5 | 1.01    | 0.01 | 0.99-1.04      | 1.23    | 0.02 1.19-1.26 |
|                                    | Biological - 6 | 1.00    | 0.02 | 0.96-1.05      | 1.19    | 0.03 1.14-1.24 |
|                                    | Biological - 7 | 1.03    | 0.04 | 0.96-1.10      | 1.19    | 0.04 1.11-1.27 |
|                                    | Biological - 8 | 1.01    | 0.05 | 0.91-1.12      | 1.12    | 0.06 1.01-1.24 |
|                                    | Adoptive - 1   | 0.85    | 0.02 | 0.81-0.88      | 0.84    | 0.04 0.77-0.92 |
|                                    | Adoptive - 2   | 0.72    | 0.03 | 0.67-0.77      | 0.79    | 0.04 0.72-0.88 |
|                                    | Adoptive - 3   | 0.50    | 0.08 | 0.37-0.69      | 0.55    | 0.09 0.40-0.75 |
|                                    | Adoptive - 4   | 0.95    | 0.26 | 0.55-1.63      | 1.07    | 0.30 0.62-1.86 |
| Diseases of the circulatory system | Childless      | 1.00    |      |                | 1.00    |                |
|                                    | Biological - 1 | 0.77    | 0.00 | 0.76-0.78      | 0.98    | 0.01 0.97-0.99 |
|                                    | Biological - 2 | 0.66    | 0.00 | 0.65-0.66      | 0.89    | 0.00 0.88-0.90 |
|                                    | Biological - 3 | 0.68    | 0.00 | 0.67-0.68      | 0.91    | 0.00 0.90-0.92 |
|                                    | Biological - 4 | 0.76    | 0.01 | 0.74-0.77      | 0.97    | 0.01 0.96-0.99 |
|                                    | Biological - 5 | 0.83    | 0.01 | 0.82-0.85      | 1.04    | 0.01 1.02-1.06 |
|                                    | Biological - 6 | 0.89    | 0.01 | 0.86-0.92      | 1.08    | 0.02 1.05-1.12 |
|                                    | Biological - 7 | 0.94    | 0.02 | 0.90-0.99      | 1.11    | 0.03 1.05-1.16 |
|                                    | Biological - 8 | 0.92    | 0.04 | 0.86-0.99      | 1.03    | 0.04 0.96-1.11 |
|                                    | Adoptive - 1   | 0.67    | 0.01 | 0.65-0.70      | 0.68    | 0.03 0.62-0.74 |
|                                    | Adoptive - 2   | 0.48    | 0.02 | 0.45-0.51      | 0.54    | 0.03 0.49-0.59 |
|                                    | Adoptive - 3   | 0.45    | 0.06 | 0.35-0.58      | 0.48    | 0.07 0.37-0.63 |
|                                    | Adoptive - 4   | 0.67    | 0.17 | 0.41-1.12      | 0.69    | 0.18 0.41-1.15 |
| External causes                    | Childless      | 1.00    |      |                | 1.00    |                |
|                                    | Biological - 1 | 0.66    | 0.01 | 0.64-0.68      | 0.90    | 0.01 0.88-0.93 |
|                                    | Biological - 2 | 0.52    | 0.01 | 0.50-0.53      | 0.77    | 0.01 0.75-0.79 |
|                                    | Biological - 3 | 0.55    | 0.01 | 0.53-0.56      | 0.80    | 0.01 0.78-0.82 |
|                                    | Biological - 4 | 0.65    | 0.01 | 0.62-0.67      | 0.90    | 0.02 0.87-0.94 |
|                                    | Biological - 5 | 0.72    | 0.02 | 0.68-0.77      | 0.96    | 0.03 0.90-1.02 |
|                                    | Biological - 6 | 0.70    | 0.04 | 0.64-0.78      | 0.90    | 0.05 0.82-1.00 |
|                                    | Biological - 7 | 0.77    | 0.06 | 0.66-0.89      | 0.93    | 0.07 0.80-1.09 |
|                                    | Biological - 8 | 0.77    | 0.09 | 0.61-0.97      | 0.87    | 0.11 0.69-1.11 |
|                                    | Adoptive - 1   | 0.48    | 0.03 | 0.43-0.53      | 0.47    | 0.05 0.37-0.58 |
|                                    | Adoptive - 2   | 0.31    | 0.03 | 0.26-0.38      | 0.40    | 0.05 0.31-0.51 |
|                                    | Adoptive - 3   | 0.22    | 0.09 | 0.10-0.49      | 0.30    | 0.12 0.13-0.67 |
|                                    | Adoptive - 4   | 0.65    | 0.38 | 0.21-2.03      | 0.94    | 0.55 0.30-2.95 |
| All other causes                   | Childless      | 1.00    |      |                | 1.00    |                |
|                                    | Biological - 1 | 0.69    | 0.01 | 0.68-0.70      | 0.88    | 0.01 0.87-0.89 |
|                                    | Biological - 2 | 0.55    | 0.00 | 0.54-0.56      | 0.74    | 0.01 0.73-0.75 |
|                                    | Biological - 3 | 0.57    | 0.00 | 0.56-0.58      | 0.76    | 0.01 0.75-0.78 |
|                                    | Biological - 4 | 0.63    | 0.01 | 0.61-0.64      | 0.81    | 0.01 0.79-0.83 |
|                                    | Biological - 5 | 0.69    | 0.01 | 0.67-0.71      | 0.86    | 0.01 0.84-0.89 |
|                                    | Biological - 6 | 0.77    | 0.02 | 0.74-0.81      | 0.94    | 0.02 0.90-0.99 |
|                                    | Biological - 7 | 0.80    | 0.03 | 0.74-0.86      | 0.94    | 0.04 0.88-1.02 |
|                                    | Biological - 8 | 0.80    | 0.05 | 0.71-0.89      | 0.91    | 0.05 0.81-1.02 |
|                                    | Adoptive - 1   | 0.55    | 0.01 | 0.52-0.57      | 0.52    | 0.03 0.46-0.59 |
|                                    | Adoptive - 2   | 0.40    | 0.02 | 0.37-0.44      | 0.45    | 0.03 0.39-0.51 |
|                                    | Adoptive - 3   | 0.51    | 0.08 | 0.37-0.70      | 0.58    | 0.10 0.42-0.81 |
|                                    | Adoptive - 4   | 0.31    | 0.15 | 0.12-0.83      | 0.36    | 0.18 0.13-0.97 |

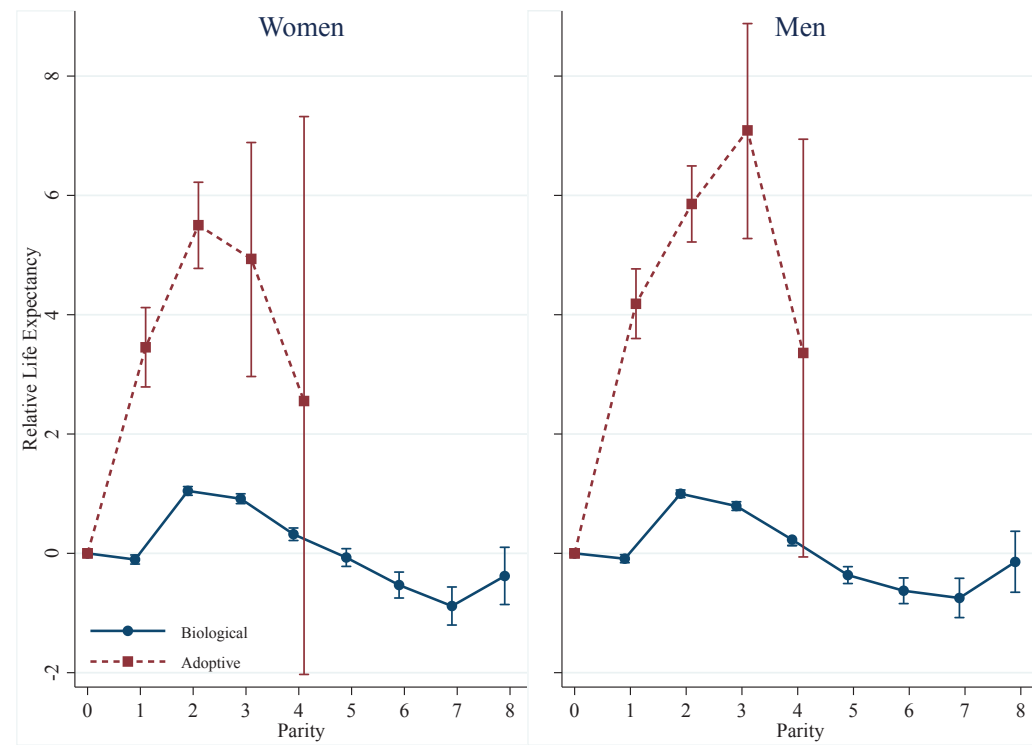

Supplement: 10680_2018_9469_MOESM1_ESM.pdf [file 10680_2018_9469_MOESM1_ESM.pdf]
